# Supplementary material for: Cuttlefish Buoyancy in Response to Food Availability and Ocean Acidification
Source: MDPI journal article supplement (doi:10.3390/biology9070147), 2020-07-01
Supplement: s1 [file s1]

*Supplemental materials*

# **Cuttlefish buoyancy in response to food availability and ocean acidification**

**Eve Otjacques \*, Tiago Repolho, José Ricardo Paula, Silvia Simão, Miguel Baptista and Rui Rosa**

MARE—Marine and Environmental Sciences Centre, Laboratório Marítimo da Guia, Faculdade de Ciências, Universidade de Lisboa, Av. Nossa Senhora do Cabo, 939, 2750-374 Cascais, Portugal ; tfrepolho@fc.ul.pt (T.R.); jrpaula@fc.ul.pt (J.R.P.); silviazevedo95@gmail.com (S.S.); msbaptista@fc.ul.pt (M.B.); rrosa@fc.ul.pt (R.R.)

\* Correspondence: ebotjacques@fc.ul.pt

**Table S1.** Seawater physicochemical parameters in all experimental setups.

|                         | Control       | High CO <sub>2</sub> |
|-------------------------|---------------|----------------------|
| <i>Measured</i>         |               |                      |
| Temperature (°C)        | 18.3 ± 0.2    | 18.4 ± 0.2           |
| pH                      | 8.059 ± 0.005 | 7.743 ± 0.033        |
| TA (μmol/kgSW)          | 2620.4 ± 13.5 | 2640.1 ± 29.8        |
| Salinity (ppm)          | 36.0 ± 0.1    | 36.0 ± 0.1           |
| <i>Calculated</i>       |               |                      |
| TC (μmol/kgSW)          | 2331.4 ± 10.8 | 2508.6 ± 27.5        |
| pCO <sub>2</sub> (μatm) | 426.7 ± 6.0   | 994.8 ± 79.6         |
| Ω Arg                   | 3.3 ± 0.1     | 1.8 ± 0.1            |

Salinity, pH and temperature were measured daily and averaged over the whole experimental period. The combination of total alkalinity (TA) and pHT (pH total scale) was used to calculate carbonate system parameters [ $p\text{CO}_2$  (carbon dioxide partial pressure), TC (total inorganic carbon) and Ω Arg (aragonite saturation state)]. Values are represented as mean ± standard deviation

**Figure S1.** Experimental design and timeline according to Sampling Endpoints.

Recently spawned egg masses were collected in October 2019 in Sado estuary (Portugal). The eggs were separated by hand and individually placed in vials.

**Acclimation time:**

The eggs stayed in control water during **6 days** upon arrival. They were then randomly affected to a CO<sub>2</sub> treatment.

**Exposure treatments, until sampling:**

**Control**

$p\text{CO}_2 \sim 400 \mu\text{atm}$ ; pH = 8.1

**High CO<sub>2</sub>**

$p\text{CO}_2 \sim 980 \mu\text{atm}$ ; pH = 7.7

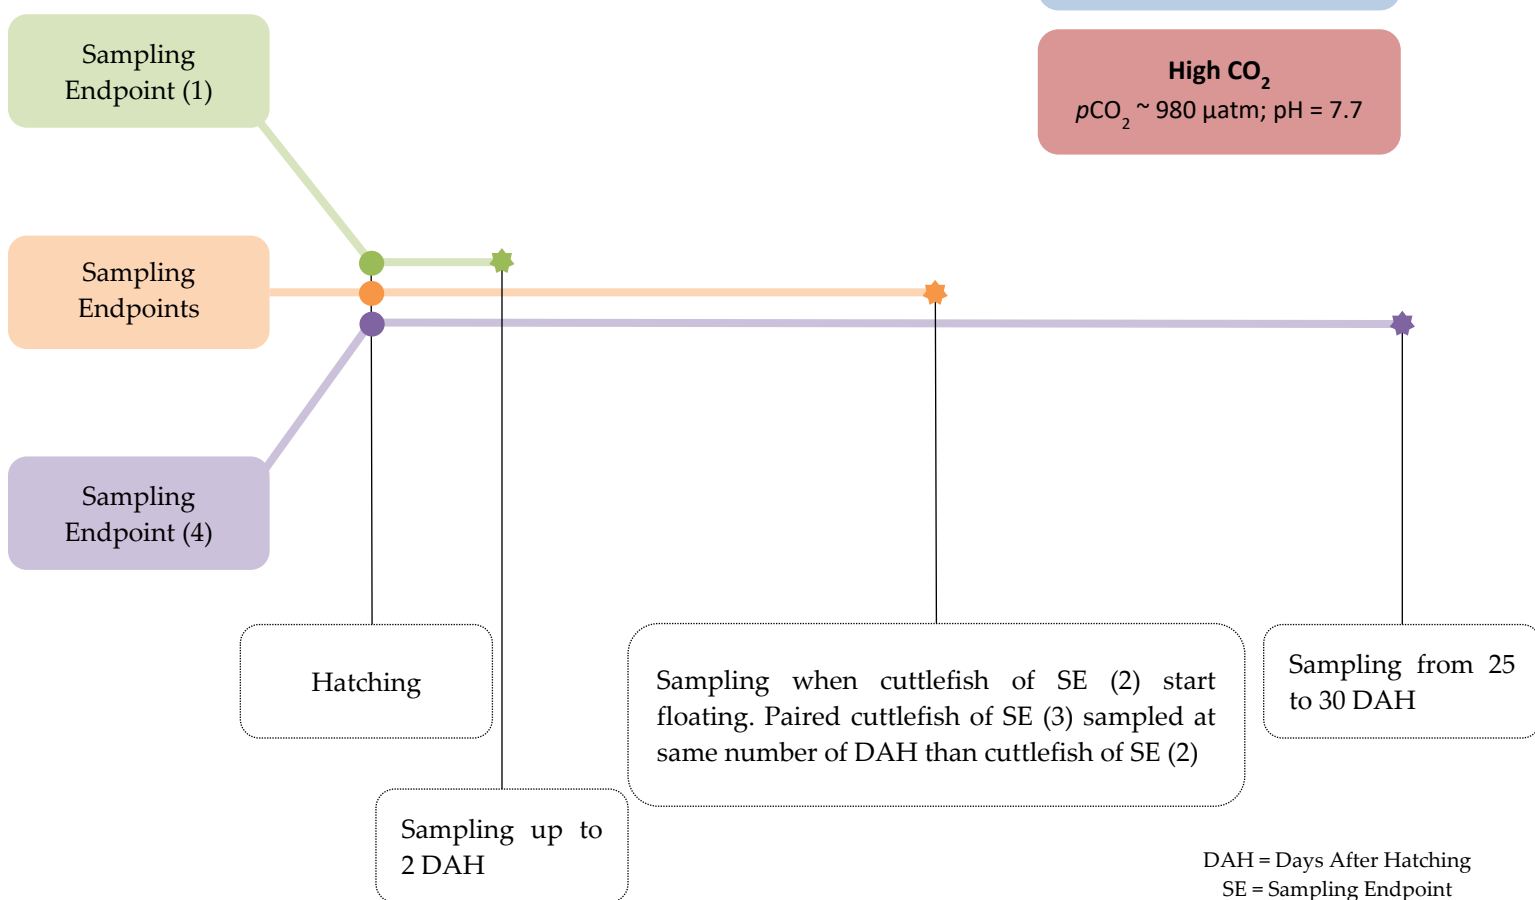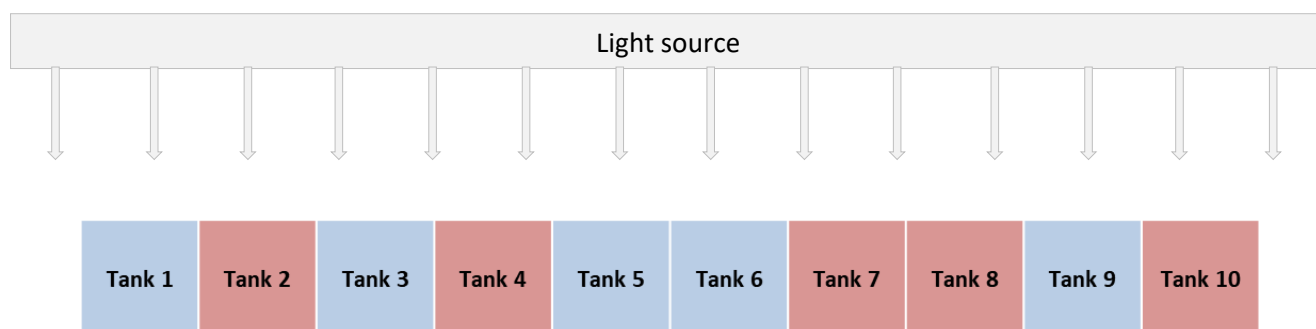

**Figure S2.** Smoothed spline plots of Schoenfeld residuals of the hatching success Cox mixed effects model relative to time.

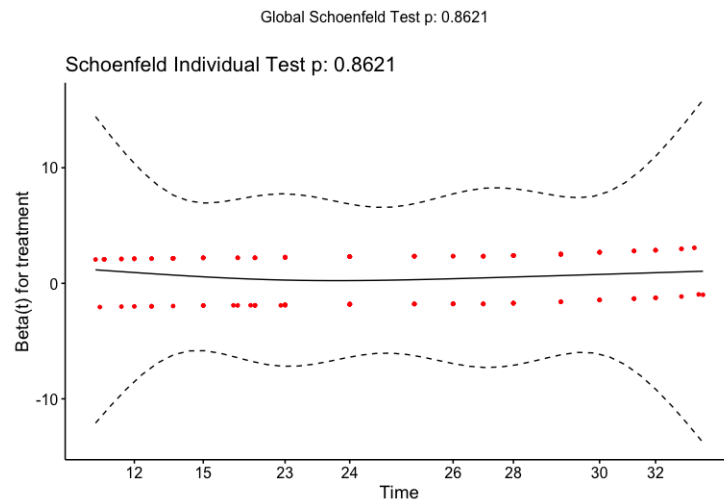

**Figure S3.** Smoothed spline plots of Schoenfeld residuals of the floating Cox mixed effects model relative to time.

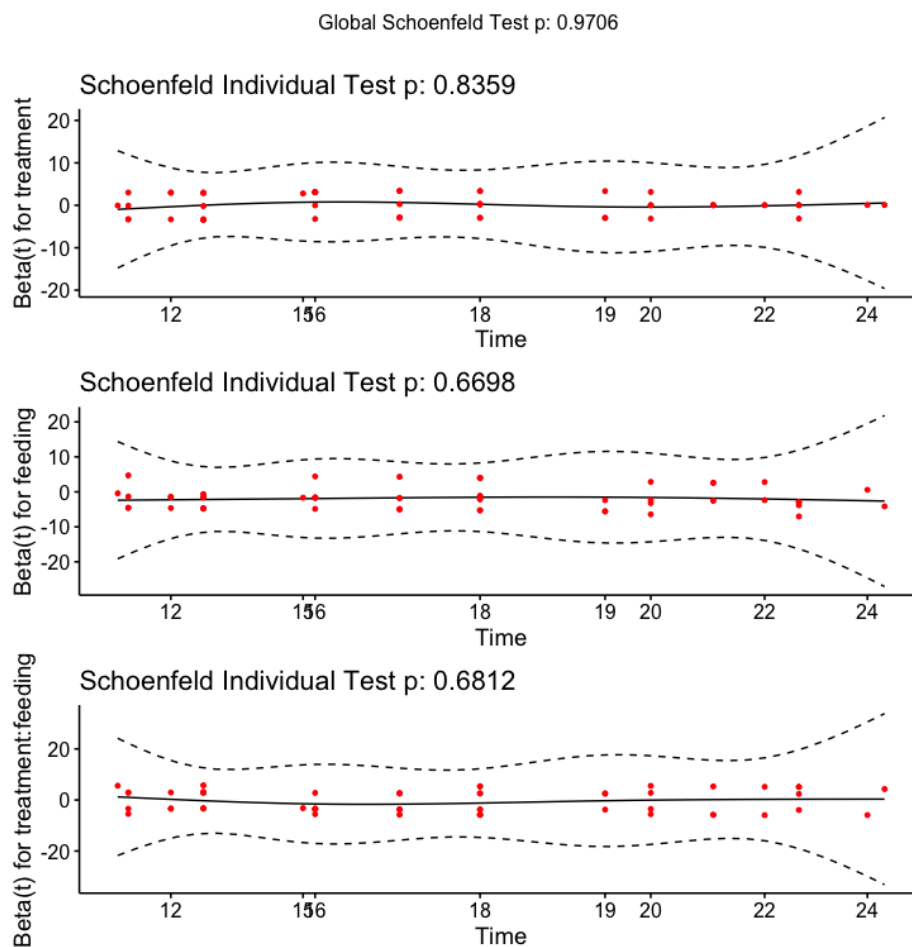

**Table S2.** Summary output for Cox mixed effects model of hatching success among CO<sub>2</sub> treatments.

|                                              | coef  | exp(coef) | se(coef) | z     | <i>p</i>     |
|----------------------------------------------|-------|-----------|----------|-------|--------------|
| CO <sub>2</sub> treatment <sub>control</sub> | 0.542 | 1.719     | 0.264    | 2.050 | <b>0.040</b> |

**Table S3.** Analysis of deviance table (Type II tests) for the Cox mixed effect model on the hatching success among CO<sub>2</sub> treatments. Values of  $p < 0.05$  are shown in bold.

|                           | df | $\chi^2$ | <i>p</i>     |
|---------------------------|----|----------|--------------|
| CO <sub>2</sub> treatment | 1  | 4.220    | <b>0.040</b> |

**Table S4.** Summary output for mixed effects model of cuttlebone weight/area ratio of hatchlings among CO<sub>2</sub> treatments and days in treatment until hatching.

|                                                                    | Estimates | Std. error | t-value | <i>p</i>         |
|--------------------------------------------------------------------|-----------|------------|---------|------------------|
| (Intercept)                                                        | 0.079     | 0.015      | 5.011   | <b>&lt;0.001</b> |
| CO <sub>2</sub> treatment <sub>control</sub>                       | 0.024     | 0.021      | 1.117   | 0.264            |
| Days until hatching                                                | 0.001     | 0.001      | 1.345   | 0.179            |
| CO <sub>2</sub> treatment <sub>control</sub> × days until hatching | -0.001    | 0.001      | -1.242  | 0.214            |

**Table S5.** Analysis of deviance table (Type II tests) for the mixed effects model of cuttlebone weight/area ratio of hatchlings among CO<sub>2</sub> treatments and days in treatment until hatching. Values of  $p < 0.05$  are shown in bold.

|                                                 | df | $\chi^2$ | <i>p</i> |
|-------------------------------------------------|----|----------|----------|
| CO <sub>2</sub> treatment                       | 1  | 0.135    | 0.713    |
| Days until hatching                             | 1  | 0.369    | 0.544    |
| CO <sub>2</sub> treatment × days until hatching | 1  | 1.543    | 0.214    |

**Table S6.** Summary output for mixed effects model of cuttlebone weight/area ratio of newborns among CO<sub>2</sub> treatment, feeding treatment and days in treatment after hatching.

|                                                                              | Estimates | Std. error | t-value | <i>p</i>     |
|------------------------------------------------------------------------------|-----------|------------|---------|--------------|
| (Intercept)                                                                  | 0.102     | 0.012      | 8.436   | <0.001       |
| Feeding                                                                      | -0.028    | 0.014      | -1.971  | <b>0.049</b> |
| CO <sub>2</sub> treatment <sub>control</sub>                                 | -0.026    | 0.018      | -1.473  | 0.141        |
| days_until_sampling                                                          | -0.001    | 0.001      | -1.014  | 0.311        |
| Feeding × CO <sub>2</sub> treatment <sub>control</sub>                       | 0.045     | 0.020      | 2.222   | <b>0.026</b> |
| Feeding × days until sampling                                                | 0.002     | 0.001      | 1.948   | 0.051        |
| CO <sub>2</sub> treatment <sub>control</sub> × days until sampling           | 0.001     | 0.001      | 1.290   | 0.197        |
| Feeding × CO <sub>2</sub> treatment <sub>control</sub> × days until sampling | -0.002    | 0.001      | -2.009  | <b>0.045</b> |

**Table S7.** Analysis of deviance table (Type II tests) for the mixed effects model of cuttlebone weight/area ratio of newborns among CO<sub>2</sub> treatments and days in treatment until hatching. Values of  $p < 0.05$  are shown in bold.

|                                                                              | df | $\chi^2$ | <i>p</i>     |
|------------------------------------------------------------------------------|----|----------|--------------|
| Feeding                                                                      | 1  | 0.622    | 0.430        |
| CO <sub>2</sub> treatment <sub>control</sub>                                 | 1  | 0.830    | 0.362        |
| days_until_sampling                                                          | 1  | 0.858    | 0.354        |
| Feeding × CO <sub>2</sub> treatment <sub>control</sub>                       | 1  | 1.445    | 0.229        |
| Feeding × days until sampling                                                | 1  | 0.579    | 0.447        |
| CO <sub>2</sub> treatment <sub>control</sub> × days until sampling           | 1  | 2.164    | 0.141        |
| Feeding × CO <sub>2</sub> treatment <sub>control</sub> × days until sampling | 1  | 4.034    | <b>0.045</b> |

**Table S8.** Summary output for Cox mixed effects model on floating among CO<sub>2</sub> and feeding treatments.

|                                                        | coef   | exp(coef) | se(coef) | z      | p                |
|--------------------------------------------------------|--------|-----------|----------|--------|------------------|
| CO <sub>2</sub> treatment <sub>control</sub>           | 0.024  | 1.025     | 0.346    | 0.070  | 0.940            |
| Feeding                                                | -1.996 | 0.136     | 0.426    | -4.680 | <b>&lt;0.001</b> |
| Feeding × CO <sub>2</sub> treatment <sub>control</sub> | -0.562 | 0.570     | 0.570    | -0.980 | 0.320            |

**Table S9.** Analysis of deviance table (Type II tests) for the Cox mixed effect model on floating among CO<sub>2</sub> and feeding treatments. Values of p<0.05 are shown in bold.

|                                     | df | $\chi^2$ | p                |
|-------------------------------------|----|----------|------------------|
| CO <sub>2</sub> treatment           | 1  | 0.430    | 0.512            |
| Feeding                             | 1  | 47.085   | <b>&lt;0.001</b> |
| Feeding × CO <sub>2</sub> treatment | 1  | 0.970    | 0.325            |

**Table S10.** Summary output for mixed effects model of cuttlebone weight/area ratio of newborns among CO<sub>2</sub> treatment, floating and days in treatment after hatching.

|                                                                               | Estimates | Std. error | t-value | p                |
|-------------------------------------------------------------------------------|-----------|------------|---------|------------------|
| (Intercept)                                                                   | 0.084     | 0.008      | 10.949  | <b>&lt;0.001</b> |
| Floating                                                                      | -0.022    | 0.017      | -1.283  | 0.200            |
| CO <sub>2</sub> treatment <sub>control</sub>                                  | 0.012     | 0.010      | 1.252   | 0.211            |
| Days until sampling                                                           | 0.001     | 0.000      | 1.587   | 0.112            |
| Floating × CO <sub>2</sub> treatment <sub>control</sub>                       | 0.006     | 0.021      | 0.278   | 0.781            |
| Floating × days until sampling                                                | 0.001     | 0.001      | 0.616   | 0.538            |
| CO <sub>2</sub> treatment <sub>control</sub> × days until sampling            | -0.001    | 0.000      | -1.798  | 0.072            |
| Floating × CO <sub>2</sub> treatment <sub>control</sub> × days until sampling | 0.000     | 0.001      | 0.053   | 0.958            |

**Table S11.** Analysis of deviance table (Type II tests) for the mixed effects model of cuttlebone weight/area ratio of newborns among CO<sub>2</sub> treatments, floating and days in treatment after hatching. Values of  $p < 0.05$  are shown in bold.

|                                                                                             | <b>df</b> | <b><math>\chi^2</math></b> | <b><math>p</math></b> |
|---------------------------------------------------------------------------------------------|-----------|----------------------------|-----------------------|
| Floating                                                                                    | 1         | 11.460                     | <b>0.001</b>          |
| CO <sub>2</sub> treatment <sub>control</sub>                                                | 1         | 0.459                      | 0.498                 |
| Days until sampling                                                                         | 1         | 0.648                      | 0.421                 |
| Floating $\times$ CO <sub>2</sub> treatment <sub>control</sub>                              | 1         | 2.351                      | 0.125                 |
| Floating $\times$ days until sampling                                                       | 1         | 1.240                      | 0.266                 |
| CO <sub>2</sub> treatment <sub>control</sub> $\times$ days until sampling                   | 1         | 3.928                      | <b>0.047</b>          |
| Floating $\times$ CO <sub>2</sub> treatment <sub>control</sub> $\times$ days until sampling | 1         | 0.003                      | 0.958                 |
